# Supplementary material
Source: PubMed Central journal article supplement (PMC3147990)
Supplement: supp_85_16_8181__1.pdf [file supp_85_16_8181__1.pdf]

Figure S1. Biological activity of IFN $\phi$ 1 and IFN $\phi$ 2

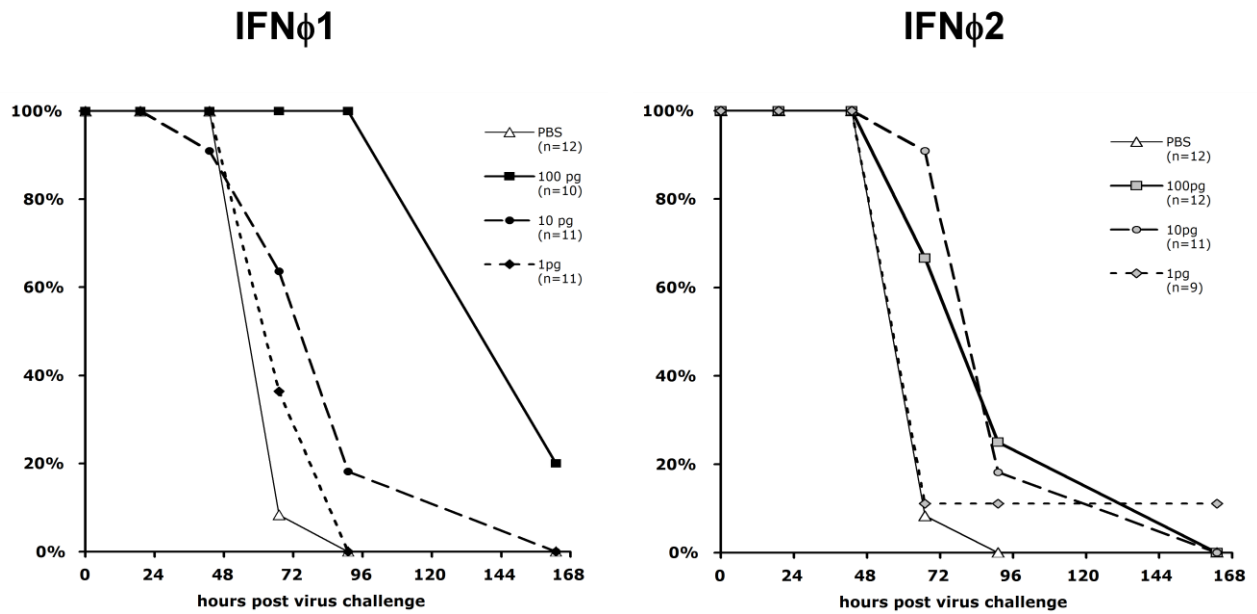

FigS1. Bioactivity of recombinant zebrafish IFNs demonstrated by increased survival to a viral challenge, using the method described in ref (2). 60hpf zebrafish larvae were injected intravenously with the indicated amount of recombinant IFN diluted in PBS (left panel, IFN $\phi$ 1; right panel, IFN $\phi$ 2). After 6 hours of incubation at 28°C, they were challenged by intravenous inoculation of 60 pfu of IHN25 virus. Larvae were then distributed in individual wells and incubated at 24°C, and their survival was regularly monitored with a stereomicroscope. With this assay, the specific activity of recombinant IFN $\phi$ 1 appears roughly 3 times higher than that of recombinant IFN $\phi$ 2.



Figure S3

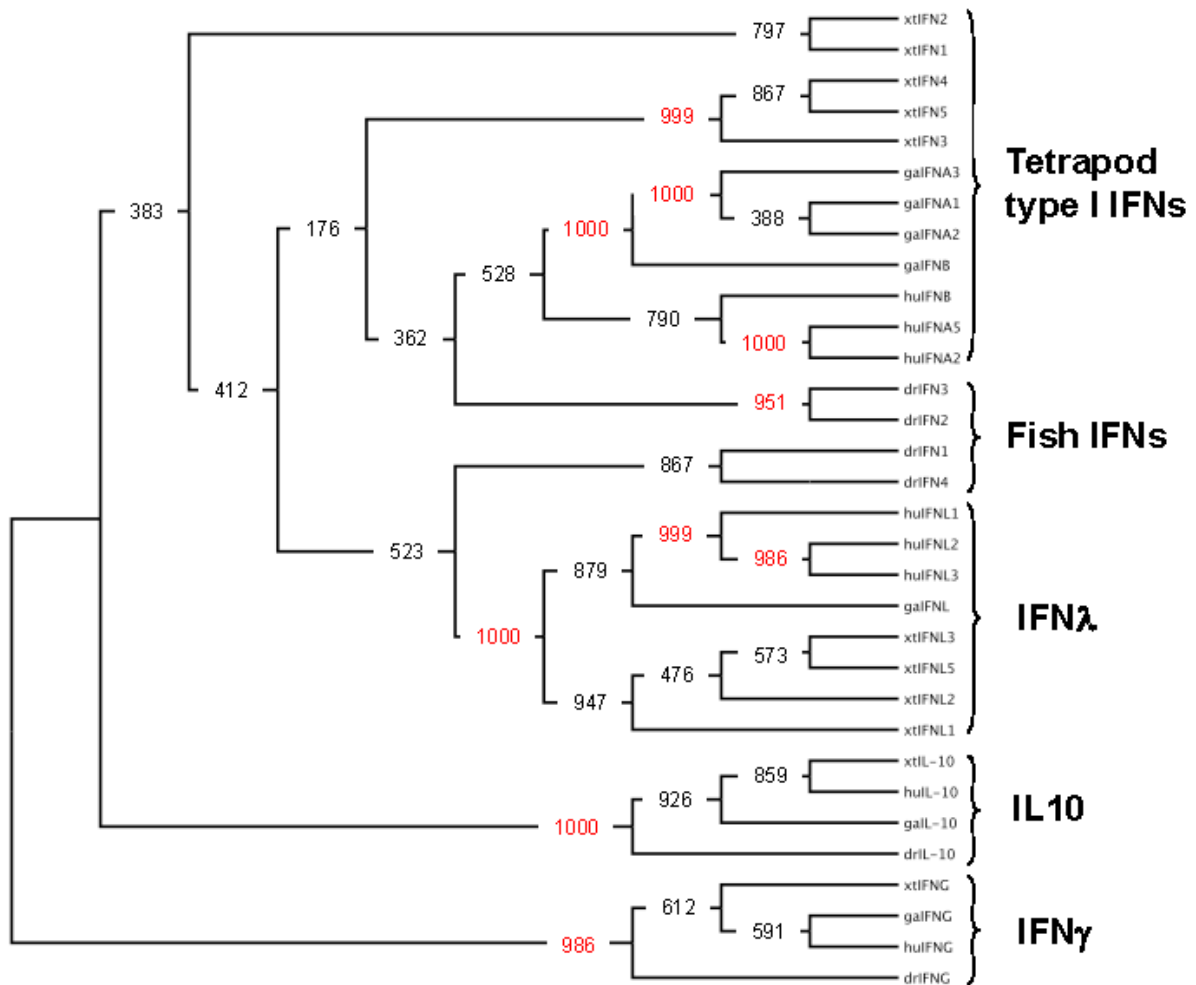

**Supplementary figure 3:** Phylogenetic tree based on the sequence alignment shown in Supplementary figure 2
